# Supplementary material
Source: Springer Nature journal article supplement (https://www.springermedizin.de/resource/supplementary/13045_2011_171_MOESM8_ESM.pdf/9660806)

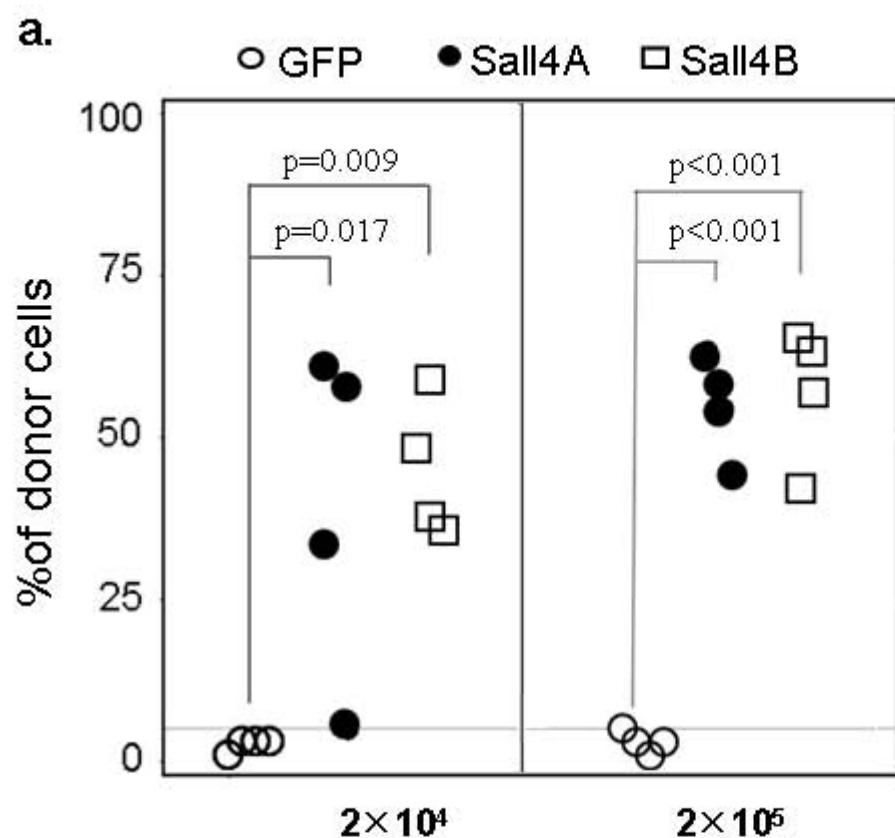

**b.**

Percent chimerism

| Virus  | BMNC      | Myeloid   | T lymphoid | B lymphoid |
|--------|-----------|-----------|------------|------------|
| Sall4A | 29.7±20.1 | 30.0±17.1 | 28.6±20.2  | 33.7±15.1  |
| Sall4B | 34.7±10.5 | 27.7±19.3 | 33.7±17.5  | 31.7±20.4  |
| GFP    | 3.8±1.1   | 2.8±1.9   | 1.4±1.6    | 3.1±2.1    |

Supplement: MOESM8 [file 9660806]
